# Supplementary material for: Biodegradation of plastic waste by yellow mealworms (Tenebrio molitor larvae)
Source: PeerJ. 2026 Jan 8;14:e20429. doi: 10.7717/peerj.20429 (PMC12790784; doi:10.7717/peerj.20429)
Supplement: Supplemental Information 2 — Daily measurements of plastic weight (n = 3). Plastics were retrieved from feeding setups and weighed to track degradation trends over the 30-day experimental period. [file peerj-14-20429-s002.xlsx]

## Sheet: Plastic Weight Data
Time (days)	Plastic_Types	R1	R2	R3	Ave	SD	Plastic_Types	R1	R2	R3	Ave	SD	Plastic_Types	R1	R2	R3	Ave	SD	Plastic_Types	R1	R2	R3	Ave	SD	Plastic_Types	R1	R2	R3	Ave	SD
1	PVC	1.1649	1.1651	1.165	1.165	8.16497e-05	PP (B)	1.1671	1.1663	1.1666	1.16667	0.000329983	LDPE	1.1625	1.1625	1.1628	1.1626	0.000141421	PP (C)	1.17	1.1702	1.1702	1.17013	9.42809e-05	PET	1.1524	1.1524	1.1524	1.1524	0
2	PVC	1.1642	1.1645	1.1643	1.16433	0.000124722	PP (B)	1.1518	1.1522	1.152	1.152	0.000163299	LDPE	1.1622	1.1623	1.162	1.16217	0.000124722	PP (C)	1.1703	1.1702	1.1703	1.17027	4.71405e-05	PET	1.153	1.1528	1.1528	1.15287	9.42809e-05
3	PVC	1.1527	1.1514	1.1527	1.15227	0.000612826	PP (B)	1.1406	1.1431	1.1429	1.1422	0.00113431	LDPE	1.1619	1.1605	1.1635	1.16197	0.00122565	PP (C)	1.1705	1.1704	1.1707	1.17053	0.000124722	PET	1.1532	1.1531	1.1533	1.1532	8.16497e-05
4	PVC	1.1312	1.131	1.1328	1.13167	0.000805536	PP (B)	1.1233	1.1228	1.1244	1.1235	0.000668331	LDPE	1.1631	1.1557	1.1668	1.16187	0.00461471	PP (C)	1.1703	1.1703	1.1702	1.17027	4.71405e-05	PET	1.153	1.1528	1.1528	1.15287	9.42809e-05
5	PVC	1.1181	1.1206	1.1191	1.11927	0.0010274	PP (B)	1.1207	1.1125	1.1092	1.11413	0.00483483	LDPE	1.1586	1.1621	1.1626	1.1611	0.00177951	PP (C)	1.17	1.1702	1.1701	1.1701	8.16497e-05	PET	1.1525	1.1524	1.1526	1.1525	8.16497e-05
6	PVC	1.1112	1.1105	1.1103	1.11067	0.000385861	PP (B)	1.1122	1.1019	1.1064	1.10683	0.00421611	LDPE	1.1618	1.1614	1.16	1.16107	0.000771722	PP (C)	1.17	1.1699	1.1702	1.17003	0.000124722	PET	1.1521	1.1522	1.1523	1.1522	8.16497e-05
7	PVC	1.1072	1.1039	1.1061	1.10573	0.00137194	PP (B)	1.1034	1.0982	1.098	1.09987	0.00249978	LDPE	1.1612	1.1626	1.1593	1.16103	0.00135236	PP (C)	1.1698	1.17	1.1699	1.1699	8.16497e-05	PET	1.1526	1.1526	1.1525	1.15257	4.71405e-05
8	PVC	1.1025	1.0933	1.097	1.0976	0.00377977	PP (B)	1.0999	1.0991	1.0984	1.09913	0.000612826	LDPE	1.1586	1.1624	1.1602	1.1604	0.00155778	PP (C)	1.169	1.1692	1.1691	1.1691	8.16497e-05	PET	1.1525	1.1525	1.1525	1.1525	0
9	PVC	1.0882	1.0906	1.0897	1.0895	0.000989949	PP (B)	1.0984	1.0886	1.0964	1.09447	0.00422795	LDPE	1.1597	1.1603	1.1606	1.1602	0.000374166	PP (C)	1.1689	1.1689	1.1688	1.16887	4.71405e-05	PET	1.1521	1.1521	1.1519	1.15203	9.42809e-05
10	PVC	1.0818	1.0855	1.0853	1.0842	0.00169902	PP (B)	1.0922	1.0912	1.0921	1.09183	0.000449691	LDPE	1.1552	1.157	1.1521	1.15477	0.00202375	PP (C)	1.1688	1.1688	1.169	1.16887	9.42809e-05	PET	1.1524	1.1525	1.1523	1.1524	8.16497e-05
11	PVC	1.0657	1.0687	1.0578	1.06407	0.00459734	PP (B)	1.0915	1.0911	1.091	1.0912	0.000216025	LDPE	1.155	1.1514	1.1532	1.1532	0.00146969	PP (C)	1.1687	1.1688	1.1688	1.16877	4.71405e-05	PET	1.1528	1.1526	1.1526	1.15267	9.42809e-05
12	PVC	1.0577	1.0581	1.0551	1.05697	0.00133	PP (B)	1.0911	1.0943	1.0874	1.09093	0.00281938	LDPE	1.1537	1.1543	1.1508	1.15293	0.00152825	PP (C)	1.1684	1.1686	1.1684	1.16847	9.42809e-05	PET	1.1523	1.1524	1.1523	1.15233	4.71405e-05
13	PVC	1.0334	1.0528	1.0511	1.04577	0.00877205	PP (B)	1.0895	1.0897	1.0838	1.08767	0.00273537	LDPE	1.1538	1.1537	1.1495	1.15233	0.00200389	PP (C)	1.1684	1.1685	1.1685	1.16847	4.71405e-05	PET	1.1525	1.1526	1.1525	1.15253	4.71405e-05
14	PVC	1.0386	1.0482	1.0372	1.04133	0.00488899	PP (B)	1.0896	1.0865	1.0842	1.08677	0.00221259	LDPE	1.1491	1.1522	1.1545	1.15193	0.00221259	PP (C)	1.1682	1.1683	1.1681	1.1682	8.16497e-05	PET	1.1522	1.1521	1.1523	1.1522	8.16497e-05
15	PVC	1.038	1.0411	1.033	1.03737	0.003337	PP (B)	1.0992	1.072	1.0875	1.08623	0.0111404	LDPE	1.1508	1.1533	1.1513	1.1518	0.00108012	PP (C)	1.168	1.1682	1.1682	1.16813	9.42809e-05	PET	1.152	1.1519	1.1518	1.1519	8.16497e-05
16	PVC	1.0347	1.0376	1.0269	1.03307	0.00451836	PP (B)	1.0852	1.0791	1.0888	1.08437	0.00400361	LDPE	1.1482	1.1537	1.153	1.15163	0.00244449	PP (C)	1.168	1.1681	1.1682	1.1681	8.16497e-05	PET	1.1527	1.1527	1.1527	1.1527	0
17	PVC	1.032	1.0307	1.0248	1.02917	0.00313298	PP (B)	1.0772	1.077	1.0987	1.0843	0.0101827	LDPE	1.1445	1.1402	1.1552	1.14663	0.00630679	PP (C)	1.1678	1.1677	1.1676	1.1677	8.16497e-05	PET	1.1524	1.1524	1.1526	1.15247	9.42809e-05
18	PVC	1.0426	1.0307	1.024	1.03243	0.0076917	PP (B)	1.0797	1.0882	1.0822	1.08337	0.00356682	LDPE	1.1405	1.134	1.1435	1.13933	0.00396513	PP (C)	1.1674	1.1673	1.1673	1.16733	4.71405e-05	PET	1.1529	1.1529	1.1531	1.15297	9.42809e-05
19	PVC	1.0422	1.0201	1.0216	1.02797	0.0100831	PP (B)	1.0847	1.0889	1.0685	1.0807	0.00879545	LDPE	1.1411	1.1402	1.1363	1.1392	0.00208327	PP (C)	1.1671	1.1672	1.1672	1.16717	4.71405e-05	PET	1.1521	1.1522	1.1522	1.15217	4.71405e-05
20	PVC	1.0097	1.0127	1.0197	1.01403	0.00418994	PP (B)	1.0642	1.0968	1.076	1.079	0.0134769	LDPE	1.136	1.1416	1.139	1.13887	0.00228813	PP (C)	1.1671	1.1672	1.1671	1.16713	4.71405e-05	PET	1.1523	1.1524	1.1525	1.1524	8.16497e-05
21	PVC	1.0026	0.9971	1.0111	1.0036	0.00575905	PP (B)	1.0693	1.0915	1.0736	1.07813	0.0096133	LDPE	1.1277	1.1366	1.146	1.13677	0.00747187	PP (C)	1.167	1.1668	1.1668	1.16687	9.42809e-05	PET	1.1525	1.1526	1.1525	1.15253	4.71405e-05
22	PVC	0.9702	0.9917	1.0065	0.989467	0.0149033	PP (B)	1.0711	1.0932	1.0661	1.0768	0.0117748	LDPE	1.1349	1.1444	1.1306	1.13663	0.00576561	PP (C)	1.1653	1.1655	1.1654	1.1654	8.16497e-05	PET	1.1525	1.1526	1.1526	1.15257	4.71405e-05
23	PVC	0.9473	0.9892	1.0043	0.980267	0.0241123	PP (B)	1.0592	1.0817	1.0726	1.07117	0.00924133	LDPE	1.135	1.1303	1.1443	1.13653	0.00581741	PP (C)	1.1652	1.1653	1.1655	1.16533	0.000124722	PET	1.1528	1.1528	1.153	1.15287	9.42809e-05
24	PVC	0.9621	0.9845	1.002	0.982867	0.01633	PP (B)	1.0579	1.0887	1.0578	1.06813	0.0145429	LDPE	1.1384	1.1407	1.1303	1.13647	0.00446044	PP (C)	1.1647	1.1645	1.1648	1.16467	0.000124722	PET	1.1521	1.1522	1.1521	1.15213	4.71405e-05
25	PVC	0.9424	0.9867	1.0065	0.978533	0.0267983	PP (B)	1.0606	1.0881	1.0538	1.0675	0.0148286	LDPE	1.1246	1.1438	1.138	1.13547	0.00804045	PP (C)	1.1641	1.1644	1.1644	1.1643	0.000141421	PET	1.1525	1.1526	1.1525	1.15253	4.71405e-05
26	PVC	0.9453	0.9861	1.0034	0.978267	0.0243574	PP (B)	1.0572	1.0892	1.0564	1.0676	0.015277	LDPE	1.1293	1.1453	1.1306	1.13507	0.0072555	PP (C)	1.1641	1.1643	1.1641	1.16417	9.42809e-05	PET	1.1518	1.1518	1.1517	1.15177	4.71405e-05
27	PVC	1.0043	0.9756	0.9526	0.9775	0.0211492	PP (B)	1.058	1.0791	1.0622	1.06643	0.00911933	LDPE	1.1137	1.1389	1.1387	1.13043	0.0118325	PP (C)	1.1641	1.1642	1.1641	1.16413	4.71405e-05	PET	1.1521	1.1523	1.1521	1.15217	9.42809e-05
28	PVC	0.9357	1.0129	0.9838	0.977467	0.0318334	PP (B)	1.0559	1.087	1.0532	1.06537	0.0153367	LDPE	1.1405	1.1342	1.1263	1.13367	0.00580938	PP (C)	1.1639	1.1639	1.164	1.16393	4.71405e-05	PET	1.1517	1.1519	1.1518	1.1518	8.16497e-05
29	PVC	0.9468	1.0017	0.9825	0.977	0.0227477	PP (B)	1.0631	1.0852	1.0467	1.065	0.0157749	LDPE	1.1345	1.1467	1.1195	1.13357	0.0111239	PP (C)	1.1639	1.1639	1.164	1.16393	4.71405e-05	PET	1.152	1.152	1.1522	1.15207	9.42809e-05
30	PVC	0.9266	1.0112	0.9808	0.972867	0.0349904	PP (B)	1.0643	1.0845	1.0461	1.06497	0.0156838	LDPE	1.1362	1.1289	1.139	1.1347	0.00425754	PP (C)	1.1634	1.1634	1.1633	1.16337	4.71405e-05	PET	1.1521	1.1518	1.1516	1.15183	0.00020548
Weight Loss Measurement
Weight loss (percent)
Food Source	R1	R2	R3	Average	SD
PVC	20.4567	13.2092	15.8112	16.4923	2.99774
PP-B	8.80816	7.01363	10.3292	8.71698	1.35509
LDPE	2.26237	2.89032	2.04678	2.39982	0.357827
PP-C	0.564103	0.581097	0.589643	0.578281	0.0106152
PET	0.0260326	0.0520653	0.0694203	0.0491727	0.0178307
Weight loss (g)
Food Source	R1	R2	R3	Average	SD
PVC	0.2383	0.1539	0.1842	0.192133	0.0349098
PP-B	0.1028	0.0818	0.1205	0.1017	0.0158183
LDPE	0.0263	0.0336	0.0238	0.0279	0.00415772
PP-C	0.0066	0.0068	0.0069	0.00676667	0.000124722
PET	0.0003	0.0006	0.0008	0.000566667	0.00020548
