# Supplementary material for: Biodegradation of plastic waste by yellow mealworms (Tenebrio molitor larvae)
Source: PeerJ. 2026 Jan 8;14:e20429. doi: 10.7717/peerj.20429 (PMC12790784; doi:10.7717/peerj.20429)
Supplement: Supplemental Information 4 — Calculations of live biomass retention based on the initial and final combined weights of mealworms, pupae, and adult darkling beetles (n = 3), providing insights into the effects of various plastic diets on live biomass retention. [file peerj-14-20429-s004.xlsx]

## Sheet: Sheet1
Food Source	Initial Weight (g)					Final Weight (g)
	R1	R2	R3	Average	SD	R1	R2	R3	Average	SD
Rice Bran	20.0795	20.0778	20.0204	20.0592	0.0274681	19.8846	19.6654	19.4065	19.6522	0.195408
PVC	20.0726	20.0242	20.0812	20.0593	0.0250899	18.8947	18.4894	19.7083	19.0308	0.506834
PP-B	20.0466	20.0831	20.0458	20.0585	0.0173955	15.92	16.2004	14.258	15.4595	0.857243
LDPE	20.0247	20.0324	20.1025	20.0532	0.0350018	10.6496	11.7074	13.2409	11.866	1.06382
PP-C	20.1113	20.0322	20.0361	20.0599	0.0364037	11.173	5.3164	6.2673	7.58557	2.56623
PET	20.0038	20.0475	20.0402	20.0305	0.0191135	5.7462	8.3984	7.2104	7.11833	1.08471
Non-Fed	20.0793	20.0474	20.0736	20.0668	0.0138906	9.6375	7.03567	7.5568	8.07666	1.124
Live Biomass Retention
Food Source	R1	R2	R3	Average	SD
Rice Bran	99.0294	97.946	96.9336	97.9697	0.855742
PVC	94.132	92.3354	98.1432	94.8702	2.4278
PP-B	79.415	80.6668	71.1271	77.0696	4.23298
LDPE	53.1823	58.4423	65.8669	59.1639	5.20354
PP-C	55.5557	26.5392	31.28	37.7917	12.7093
PET	28.7255	41.8925	35.9797	35.5326	5.38468
Non-Fed	47.9971	35.0951	37.6454	40.2459	5.57897
